# Supplementary material for: Molecular epidemiology of Klebsiella variicola obtained from different sources
Source: PubMed Central journal article supplement (PMC6650414; doi:10.1038/s41598-019-46998-9), 2019-07-23
Supplement: 41598_2019_46998_MOESM2_ESM.pdf [file 41598_2019_46998_MOESM2_ESM.pdf]

## **Molecular epidemiology of *Klebsiella variicola* obtained from different sources**

Barrios-Camacho Humberto<sup>1&</sup>, Aguilar-Vera Alejandro<sup>2&</sup>, Beltran-Rojel Marilu<sup>1</sup>, Aguilar-Vera Edgar<sup>3</sup>, Duran-Bedolla Josefina<sup>1</sup>, Rodriguez-Medina Nadia<sup>1</sup>, Lozano-Aguirre Luis<sup>4</sup>, Perez-Carrascal Olga Maria<sup>4</sup>, Rojas Jesús<sup>3</sup>, and Garza-Ramos Ulises<sup>1\*</sup>

Corresponding author

Garza-Ramos Ulises ([ulises.garza@insp.mx](mailto:ulises.garza@insp.mx)) Instituto Nacional de Salud Pública (INSP), Centro de Investigación Sobre Enfermedades Infecciosas (CISEI), Laboratorio de Resistencia Bacteriana, Cuernavaca, Morelos, México.

<sup>1</sup>Instituto Nacional de Salud Pública (INSP), Centro de Investigación Sobre Enfermedades Infecciosas (CISEI), Laboratorio de Resistencia Bacteriana, Cuernavaca, Morelos, México.

<sup>2</sup>Universidad Nacional Autónoma de México, Centro de Ciencias Genómicas, Programa de Genómica Funcional de Procariotes, Cuernavaca, Morelos, México.

<sup>3</sup>Instituto Nacional de Salud Pública (INSP), Centro de Información para Decisiones en Salud Pública (CENIDSP).

<sup>4</sup>Universidad Nacional Autónoma de México, Centro de Ciencias Genómicas, Programa de Genómica Evolutiva, Cuernavaca, Morelos, México.

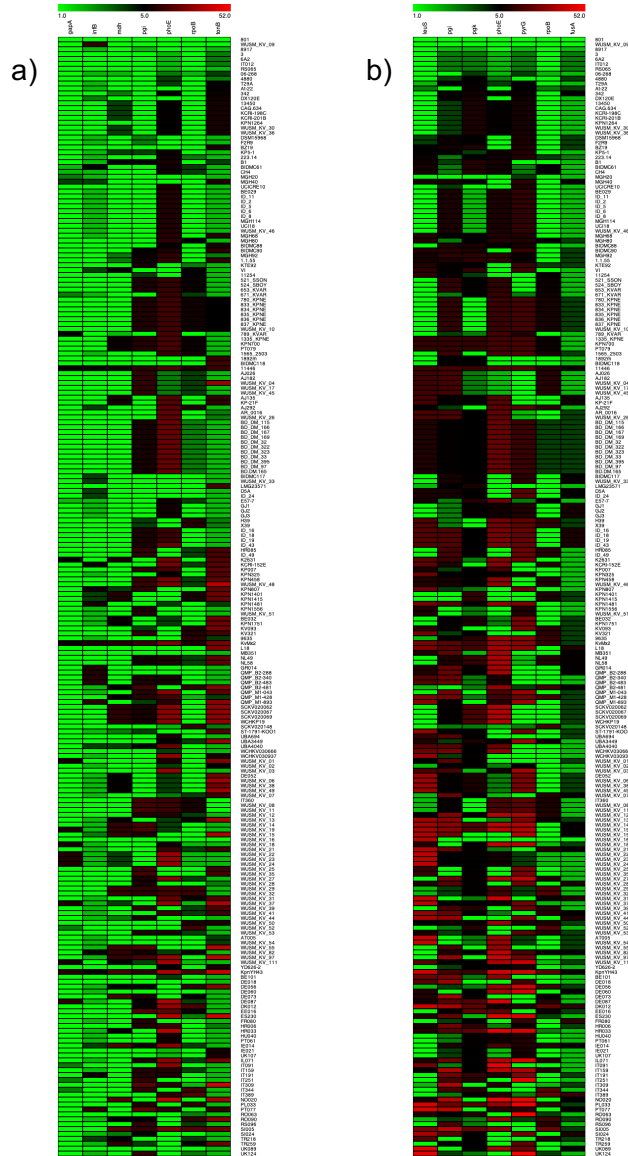

**Fig. S2.** Heatmap showing the allelic profile variation of *K. variicola*. a) Allelic profile variation of *K. variicola* genomes using the *K. pneumoniae* MLST scheme. b) Allelic profile variation of *K. variicola* genomes using the *K. variicola* MLST scheme.
